# Supplementary material for: Cortisol Awakening Reaction and Anxiety in Depressed Coronary Artery Disease Patients
Source: MDPI journal article supplement (doi:10.3390/jcm11020374), 2022-01-13
Supplement: s1 [file s1]

# Supplementary Material

**Table S1.** Correlation analyses.

| Variables                       | AUCg   |       | AUCi   |       |
|---------------------------------|--------|-------|--------|-------|
|                                 | r      | p     | r      | p     |
| Age                             | 0.108  | 0.348 | −0.129 | 0.264 |
| BMI                             | −0.028 | 0.814 | −0.081 | 0.490 |
| Sex                             | −0.195 | 0.089 | 0.071  | 0.537 |
| Beta blocker                    | −0.072 | 0.536 | −0.043 | 0.710 |
| CCI                             | −0.089 | 0.444 | −0.147 | 0.201 |
| Number of affected vessels      | −0.029 | 0.808 | 0.134  | 0.253 |
| LVEF                            | −0.279 | 0.032 | −0.163 | 0.217 |
| HADS depression                 | 0.079  | 0.493 | 0.195  | 0.089 |
| HADS anxiety                    | <0.001 | 0.999 | 0.218  | 0.057 |
| PHQ depression                  | 0.042  | 0.726 | 0.117  | 0.325 |
| DS-14 negative affectivity      | 0.132  | 0.254 | −0.031 | 0.789 |
| DS-14 social inhibition         | 0.021  | 0.854 | −0.012 | 0.919 |
| MQ vital exhaustion             | 0.076  | 0.525 | 0.170  | 0.150 |
| SF-36 physical health sum score | 0.017  | 0.886 | 0.001  | 0.991 |
| SF-36 mental health sum score   | −0.072 | 0.553 | −0.083 | 0.492 |

**Table S2.** Repeated-measures ANOVA 4 steps (cortisol +0, +30, +45, +60), 2 groups (anxious vs. non anxious).

| Source of variation | Type III Sum of Squares | Mean Square | F     | df    | p      |
|---------------------|-------------------------|-------------|-------|-------|--------|
| Time                | 670.613                 | 286.126     | 9.003 | 2.344 | <0.001 |
| Time x Group        | 398.871                 | 170.184     | 5.355 | 2.344 | 0.003  |

**Table S3.** Repeated-measures ANOVA 4 steps (cortisol +0, +30, +45, +60), 2 groups (anxious vs. non anxious) with confounders (LVEF, hyperlipidemia).

| Source of variation   | Type III Sum of Squares | Mean Square | F     | df    | p     |
|-----------------------|-------------------------|-------------|-------|-------|-------|
| Time                  | 334.017                 | 148.322     | 4.564 | 2.252 | 0.009 |
| Time x LVEF           | 161.848                 | 71.869      | 2.211 | 2.252 | 0.107 |
| TIME x hyperlipidemia | 53.447                  | 23.733      | 0.730 | 2.252 | 0.499 |
| Time x Group          | 407.902                 | 181.131     | 5.573 | 2.252 | 0.003 |

**Table S4.** Repeated-measures ANOVA 4 steps (cortisol +0, +30, +45, +60), 2 groups (anxious vs. non anxious) with confounders (smoking status, Type D, SES).

| Source of variation | Type III Sum of Squares | Mean Square | F     | df    | p     |
|---------------------|-------------------------|-------------|-------|-------|-------|
| Time                | 265.786                 | 114.875     | 3.724 | 2.314 | 0.021 |
| Smoking status      | 141.306                 | 61.074      | 1.980 | 2.314 | 0.134 |

|              |         |         |       |       |        |
|--------------|---------|---------|-------|-------|--------|
| Type D       | 97.613  | 42.189  | 1.368 | 2.314 | 0.258  |
| SES          | 174.055 | 75.228  | 2.439 | 2.314 | 0.082  |
| Time x Group | 631.708 | 273.029 | 8.850 | 2.314 | <0.001 |

**Table S5.** Repeated-measures ANOVA 4 steps (cortisol +0, +30, +45, +60), 2 groups (anxious vs. non anxious) with confounders (age, sex).

| Source of variation | Type III Sum of Squares | Mean Square | F     | df    | <i>p</i> |
|---------------------|-------------------------|-------------|-------|-------|----------|
| Time                | 30.704                  | 13.101      | 0.404 | 2.344 | 0.701    |
| Age                 | 17.180                  | 7.330       | 0.226 | 2.344 | 0.831    |
| Sex                 | 21.762                  | 9.285       | 0.286 | 2.344 | 0.785    |
| Time x Group        | 338.626                 | 144.487     | 4.454 | 2.344 | 0.009    |
